# Supplementary material
Source: PubMed Central journal article supplement (PMC3307278)
Supplement: supp_M111.312199_jbc.M111.312199-1.pdf [file supp_M111.312199_jbc.M111.312199-1.pdf]

## SUPPLEMENTAL INFORMATION

### IDENTIFICATION OF *N*-ACETYLAURINE AS A NOVEL METABOLITE OF ETHANOL THROUGH METABOLOMICS-GUIDED BIOCHEMICAL ANALYSIS

Xiaolei Shi, Dan Yao, Chi Chen

Department of Food Science and Nutrition, University of Minnesota, St. Paul, MN 55108

#### Table of contents

|                                      | page  |
|--------------------------------------|-------|
| Supplemental experimental procedures | S1-S2 |
| Figure S1                            | S3    |
| Figure S2                            | S4    |
| Table S1                             | S5    |

#### SUPPLEMENTAL EXPERIMENTAL PROCEDURES

**Preparation of semi-solid ethanol diet.** 0.5% (w/w) agar powder is dissolved in warm water (1/2 of the total water volume). The control dextrose diet powder and the Lieber-DeCarli ethanol diet powder (Bio-Serv) are mixed in a ratio based on desired ethanol concentration and then suspended in water (the other 1/2 of the total water volume). Two solutions are blended together and ethanol is added to reach to desired concentration. Prepared semi-solid ethanol diet is stored in air-tight container at 4°C and is used within a week.

**Comparison of the feeding tubes for semi-solid ethanol diet and liquid ethanol diet.** The customized feeding tube for semi-solid ethanol diet (**A**) and the standard feeding tube for liquid ethanol diet (**B**) are shown below.

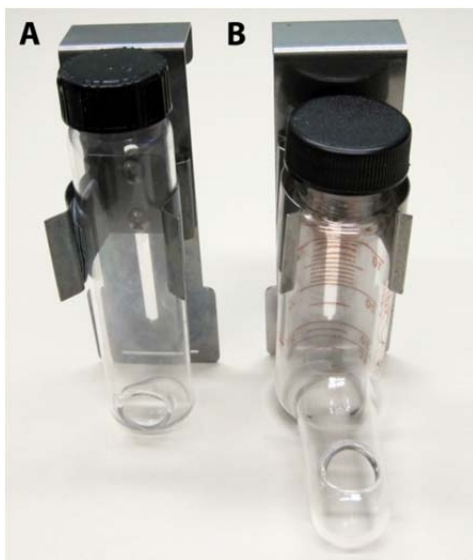

***Determining the factors affecting the NAT biosynthesis in vitro.*** Liver homogenates of the wild-type mice were incubated with 20 mM taurine, 2.5 mM acetate, and various compounds including metal ions (CaCl<sub>2</sub>, CsCl<sub>2</sub>, FeCl<sub>2</sub>, HgCl<sub>2</sub>, MgCl<sub>2</sub>), chelator (EDTA), esterase inhibitors (PMSF, Diazinon) and substrate analogs ( $\beta$ -alanine,  $\alpha$ -alanine, cysteine, propionic acid, butyric acid). The production of NAT after 30-min incubation was quantitated by the LC-MS analysis.

### SUPPLEMENTAL FIGURES

**Figure S1.** The scores plot of a PLS-DA model on urine samples from the wild-type and *Cyp2e1*-null mice fed with control and ethanol diets. All samples from the wild-type and *Cyp2e1*-null mice with no ethanol exposure were labeled as WT\_Ctl (■) and KO\_Ctl (◇), respectively, while the samples from both mouse lines with ethanol treatment were labeled as WT\_EtOH (△) and KO\_EtOH (◆), respectively, which include the samples from 7-day, 14-day and 21-day ethanol treatment. The  $t[1]$  and  $t[2]$  values represent the scores of each sample in the principal component 1 and 2, respectively.

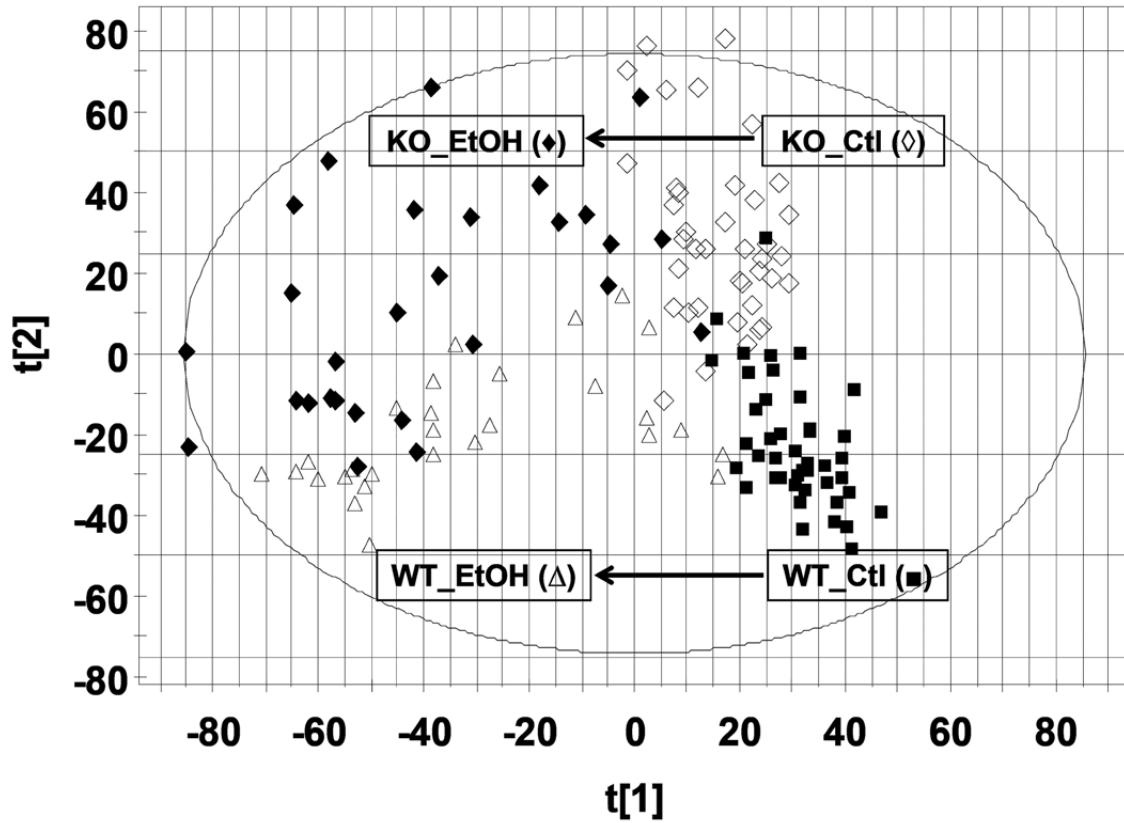

**Figure S2.** Relative abundance of urinary biomarkers of ethanol exposure in the wild-type (WT) and *Cyp2e1*-null (KO) mice during the 21-day ethanol treatment. The abundance of a urinary metabolite was expressed as a value that is 10,000 fold of the ratio between the single ion count (SIC) of a metabolite and the total ion count (TIC) of a urine sample detected by mass spectrometer (Relative abundance =  $10000 \times \text{SIC/TIC}$ ). **A.** Relative abundance of urinary NAT. **B.** Relative abundance of urinary EtG. Values were presented as mean  $\pm$  S.D (n=8). \* ( $p < 0.05$ ) and \*\* ( $p < 0.01$ ) indicate statistical significance between WT and KO samples at the same time point.

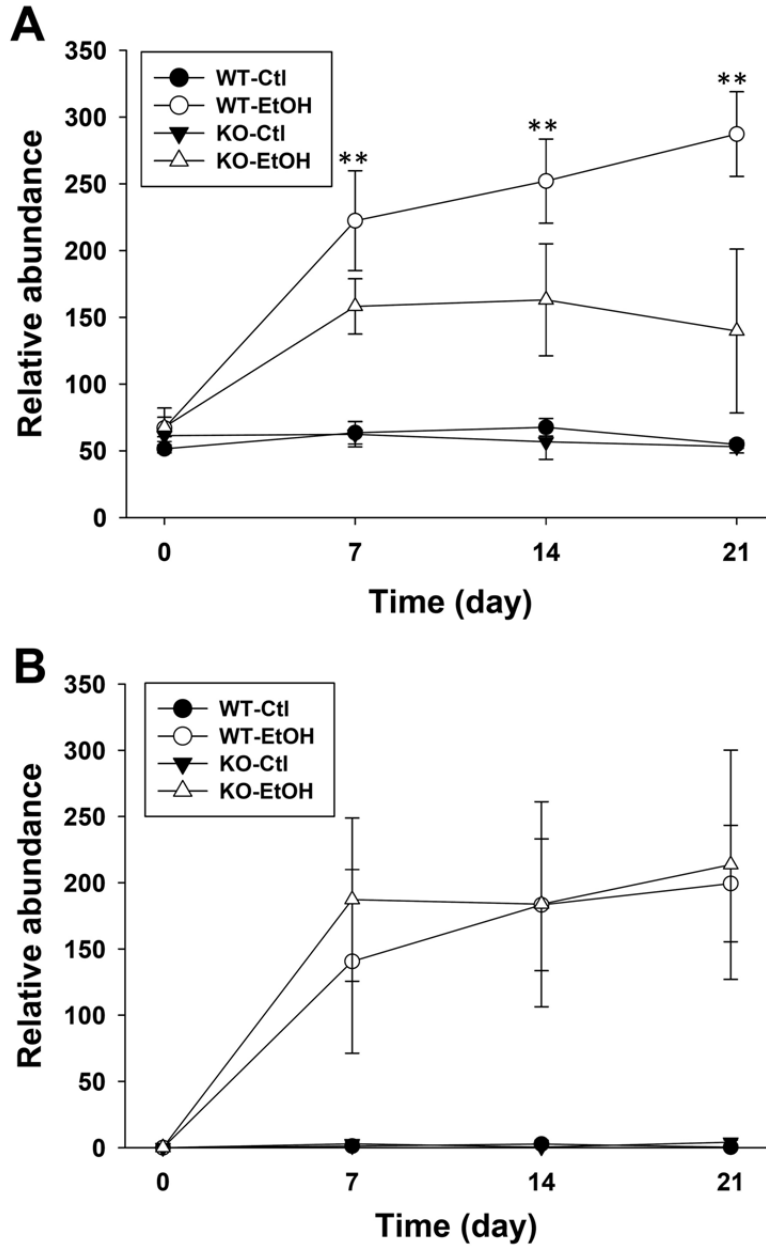

**SUPPLEMENTAL TABLE**

**Table S1:** The effects of metal ions, chelator, esterase inhibitors, and substrate analogs on the production of NAT *in vitro*. The conditions of the *in vitro* assay are described in the *Supplemental Experimental Procedures*. The enzymatic activity of the control mouse liver homogenate (no compound added) is defined as 100%. The effects of treatment compounds on the activity of NAT synthase are represented by the changes (%) in the NAT production in comparison with the control (+, stimulation; -, inhibition).

|                         | Metal ions (mM) |       | Chelator (mM)                   |            |          | Substrate analogs (mM) |       |       |
|-------------------------|-----------------|-------|---------------------------------|------------|----------|------------------------|-------|-------|
|                         | 0.1             | 1     |                                 | 1          | 10       |                        | 1     | 2.5   |
| <b>CaCl<sub>2</sub></b> | +21.8           | +10   | <b>EDTA</b>                     | -33.6      | -72.7    | <b>β-alanine</b>       | -25.5 | -36.4 |
| <b>CsCl<sub>2</sub></b> | +16.4           | +31.8 | <b>Esterase inhibitors (mM)</b> |            |          | <b>L-alanine</b>       | -25.5 | -24.6 |
| <b>FeCl<sub>2</sub></b> | +11.8           | +3.6  |                                 | <b>0.1</b> | <b>1</b> | <b>Cysteine</b>        | -23.6 | -32.7 |
| <b>HgCl<sub>2</sub></b> | -45.5           | -57.3 | <b>PMSF</b>                     | -19.1      | -40.9    | <b>Propionic acid</b>  | -36.4 | -61.8 |
| <b>MgCl<sub>2</sub></b> | -10.9           | -21.8 | <b>Diazinon</b>                 | -8.2       | -40.9    | <b>Butyric acid</b>    | -35.5 | -50.9 |
